# Supplementary material for: Implanting an electrolyte additive on a single crystal Ni-rich cathode surface for improved cycleability and safety
Source: Royal Society of Chemistry journal article supplement (doi:10.1039/d0ta08038a), 2020-01-01
Supplement: d0ta08038a1.pdf [file d0ta08038a1.pdf]

Supporting information

## **Implanting electrolyte additive on Single Crystal Ni-Rich Cathode surface for Improved Cycleability and Safety**

*Yongkang Han,<sup>a,b</sup> Jinmei Xu,<sup>a</sup> Wei Wang,<sup>a</sup> Fu Long,<sup>b</sup> Qunting Qu,<sup>\*a</sup> Yan Wang,<sup>a,b</sup> and Honghe Zheng,<sup>\*a,b</sup>*

*<sup>a</sup> College of Energy & Collaborative Innovation Center of Suzhou Nano Science and Technology,*

*Soochow University, Suzhou, Jiangsu 215006, PR China*

*<sup>b</sup> Huaying New Energy Materials. Co. Suzhou, Jiangsu 215000, PR China*

**Keywords:** Ni-rich cathode; In-sit implanting; electrolyte additive; cycleability

### **Corresponding Author**

\* E-mail addresses:

[qtqu@suda.edu.cn](mailto:qtqu@suda.edu.cn) (Qunting Qu)

[hhzheng@suda.edu.cn](mailto:hhzheng@suda.edu.cn) (Honghe Zheng)

Table S1 Different amounts of the  $\text{H}_3\text{BO}_3$  and  $\text{Al}_2(\text{C}_2\text{O}_4)_3 \cdot x\text{H}_2\text{O}$  modifiers used in this study

| Sample  | $\text{H}_3\text{BO}_3$ | $\text{Al}_2(\text{C}_2\text{O}_4)_3 \cdot x\text{H}_2\text{O}$ | SC-NCM |
|---------|-------------------------|-----------------------------------------------------------------|--------|
| 1wt %   | 4.6 mg                  | 11.9 mg                                                         | 1.2 g  |
| 1.5wt % | 7.0 mg                  | 17.8 mg                                                         | 1.2 g  |
| 2.0wt % | 9.3 mg                  | 23.7 mg                                                         | 1.2 g  |

The ball-milled method: Using a spherical abrasive rod, grind  $\text{Al}_2(\text{C}_2\text{O}_4)_3 \cdot x\text{H}_2\text{O}$  and  $\text{H}_3\text{BO}_3$  for 1 hour, then, NCM powder is added into the mixture grind for 30 min grinding without using any solvents.

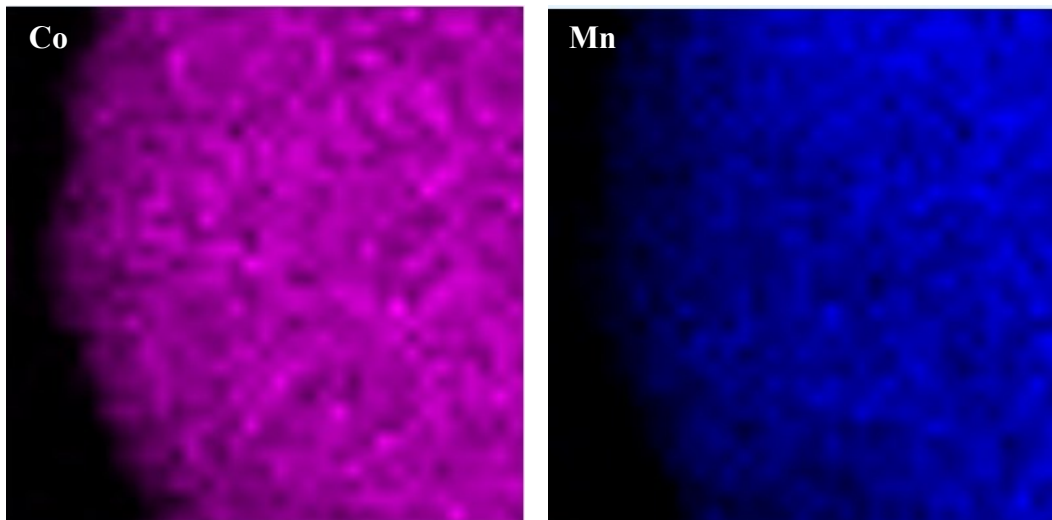

Fig. S1. Element distribution for Co and Mn elements in SC-NCM/AB sample

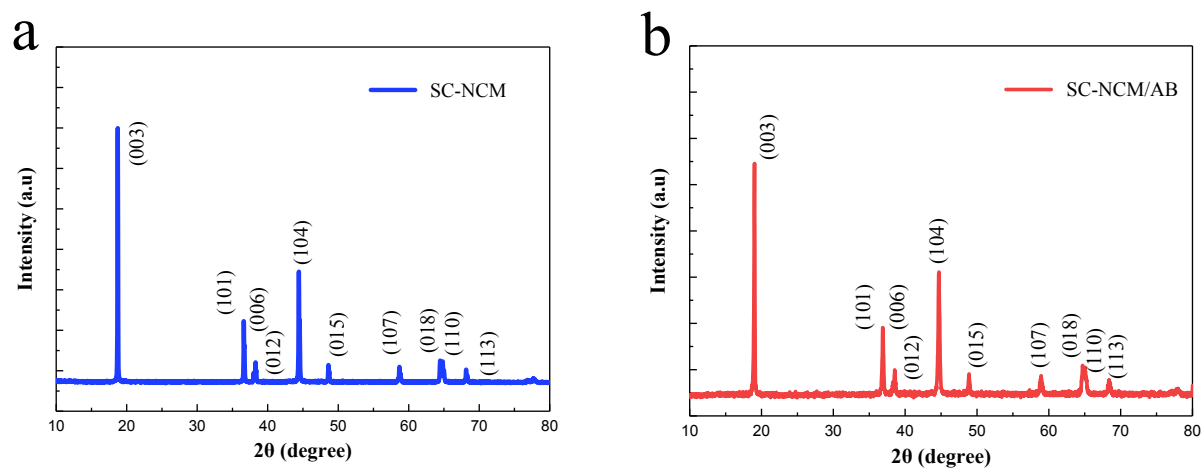

Figure S2 The XRD patterns for SC-NCM (a) and SC-NCM/AB (b).

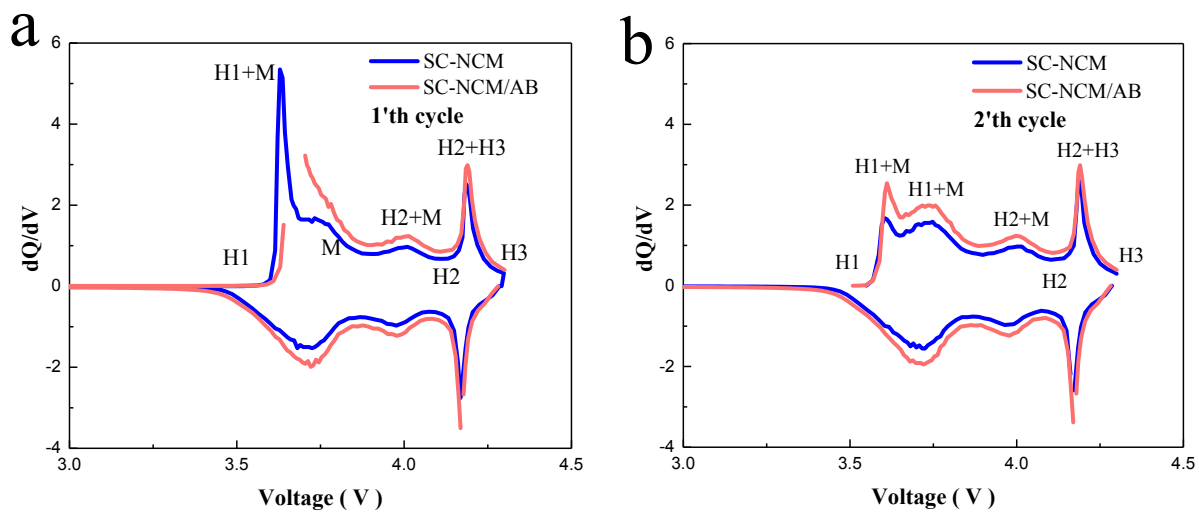

Figure S3 Electrochemical behavior for the SC-NCM and SC-NCM/AB samples: (a, b)  $dQ/dV$  curves vs. the cell voltage for the initial two cycles between 2.8-4.3 V.

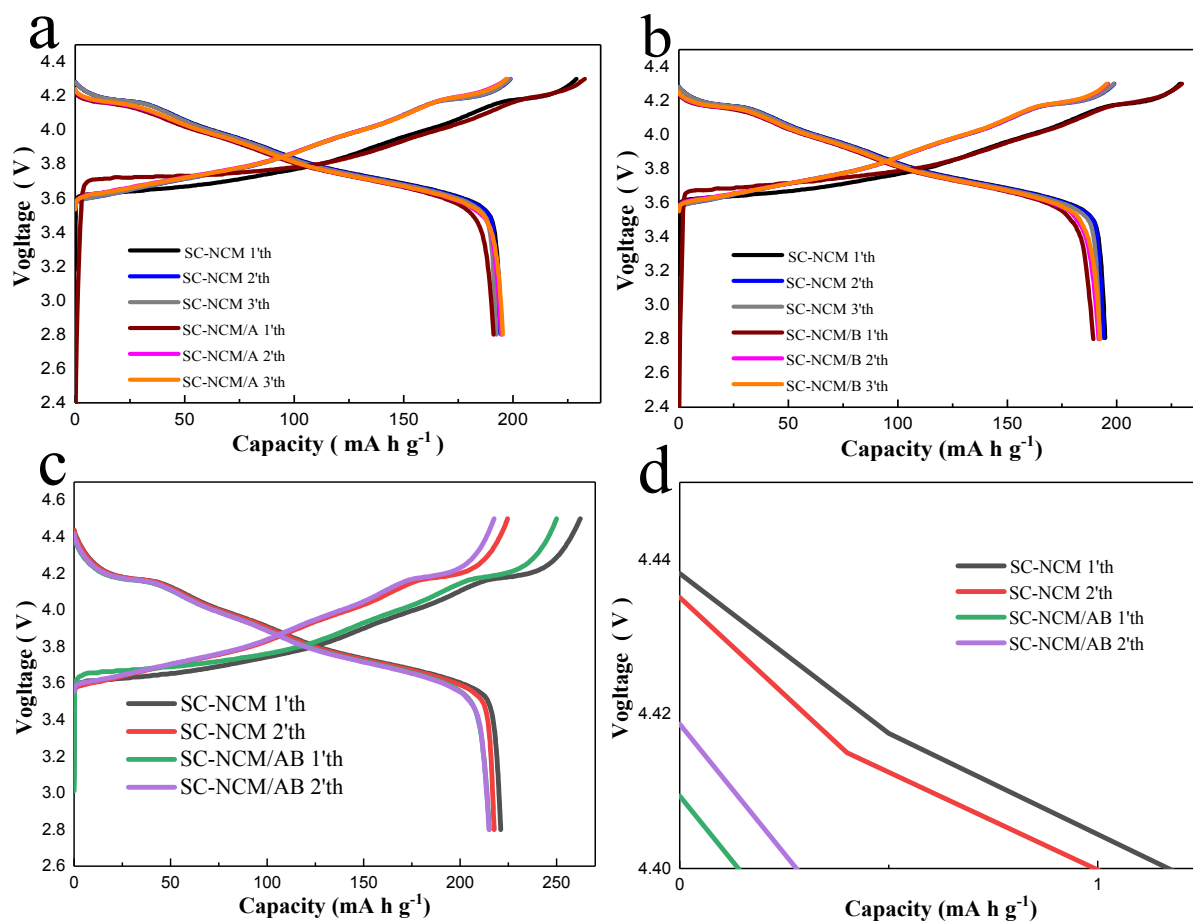

Figure S4 Electrochemical behavior for the SC-NCM, SC-NCM/A, SC-NCM/B and SC-NCM/AB samples: (a, b) the first three charge and discharge profiles at 0.1 C between 2.8 - 4.3 V at 25 °C for the SC-NCM/A and SC-NCM/B samples; (c, d) the first two charge and discharge profiles at 0.1 C between 2.8 - 4.5 V at 25 °C for the SC-NCM and SC-NCM/AB samples.

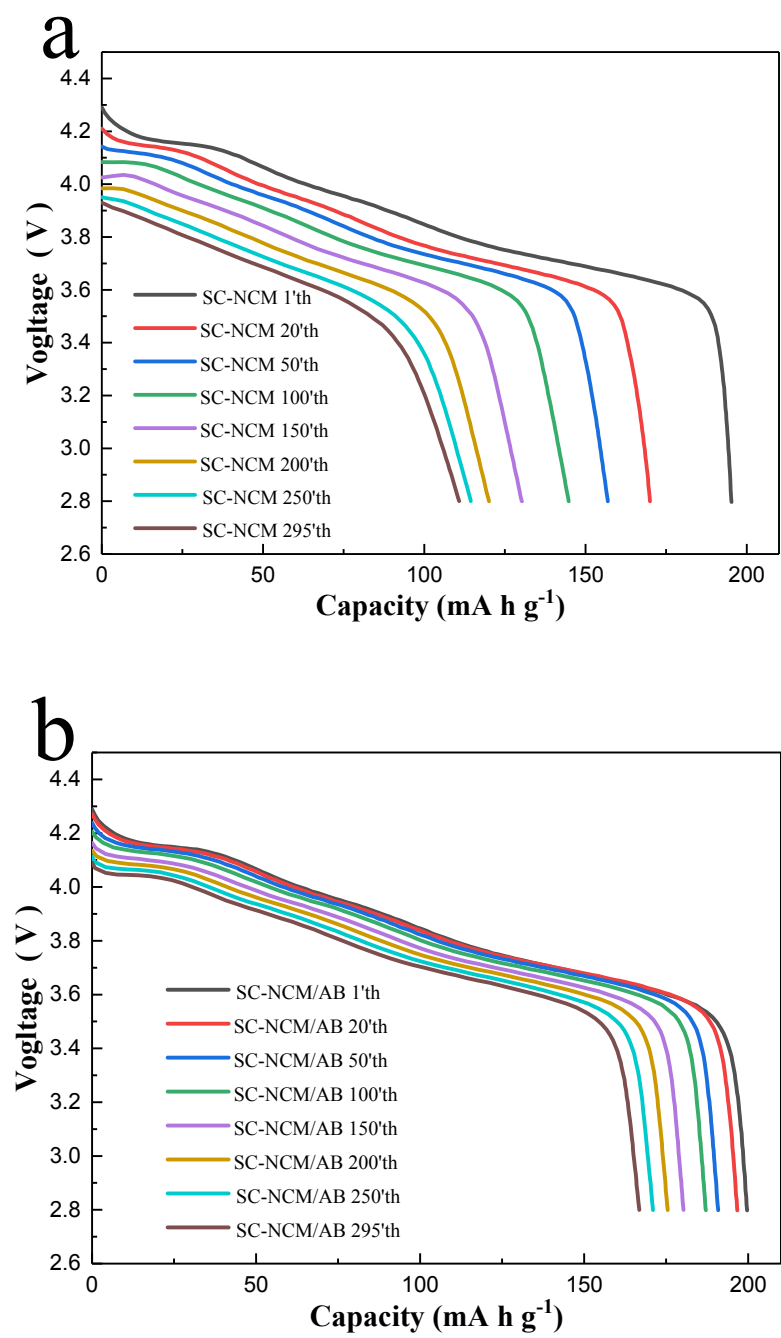

Figure S5. The discharge profiles between 2.8 - 4.5 V at 0.5 C for SC-NCM (a) and SC-NCM/AB (b), respectively.

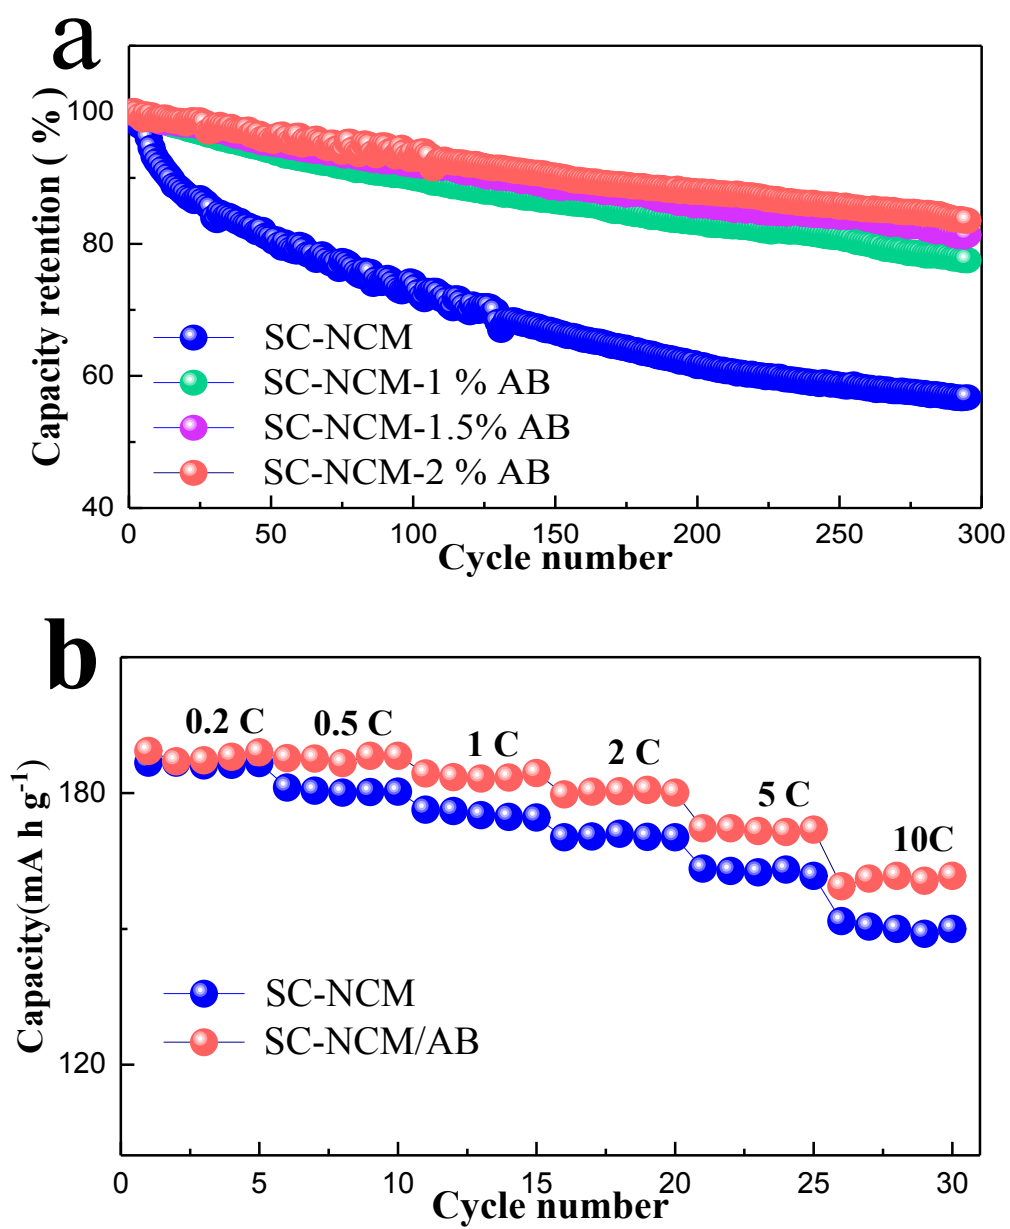

Figure S6. (a) Cycling behavior at 0.5 C rate between 2.8 - 4.5 V at 25°C with different account of Al(Li)BOB layer, (b) rate capability for SC-NCM and SC-NCM/AB.

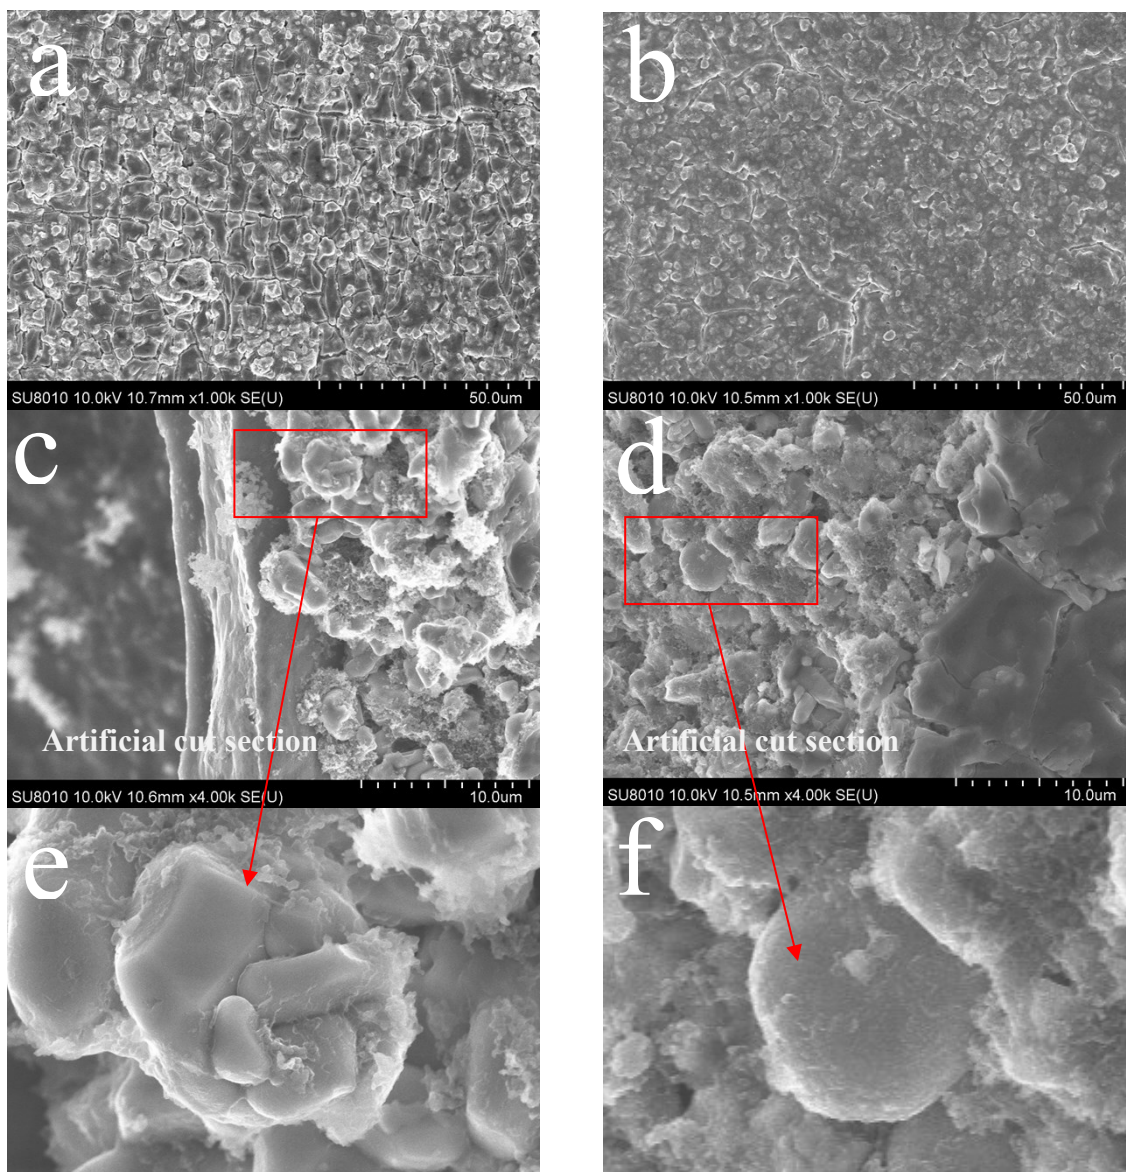

Figure S7. (a, b) SEM images of the SC-NCM and SC-NCM/AB after 295 cycles at 0.5 C between 2.8 - 4.5 V ; (c, d) SEM images of the SC-NCM and SC-NCM/AB in the artificial cut section after 295 cycles at 0.5 C between 2.8 - 4.5 V ; (e, f) the magnified image from the selected area of c and d, respectively.

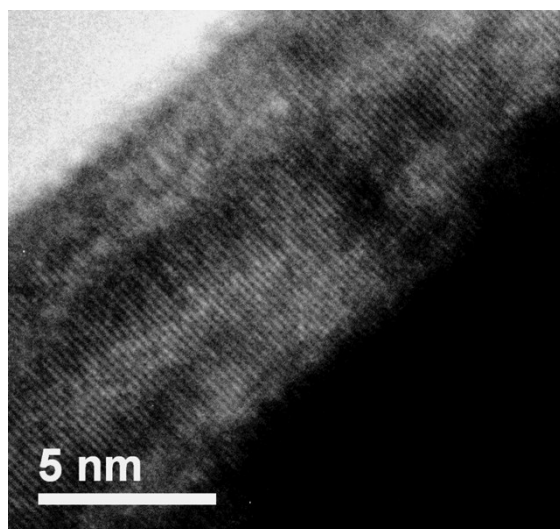

Figure S8. TEM images for the SC-NCM/AB sample before electrochemical cycle

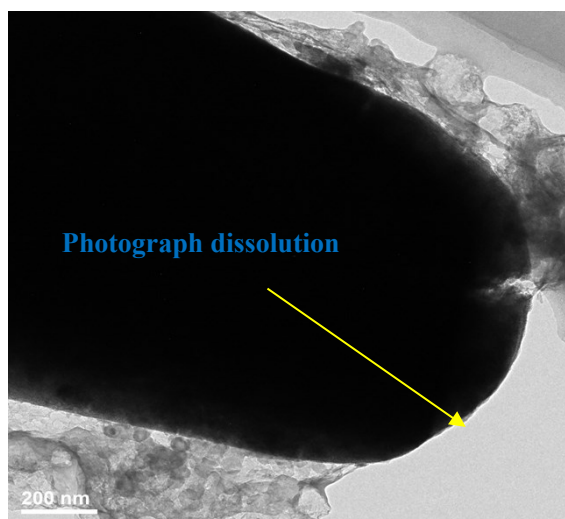

Figure S9. TEM images of the SC-NCM/AB focused on the CEI layer after 295 cycles at 0.5 C between 2.8 - 4.5 V .



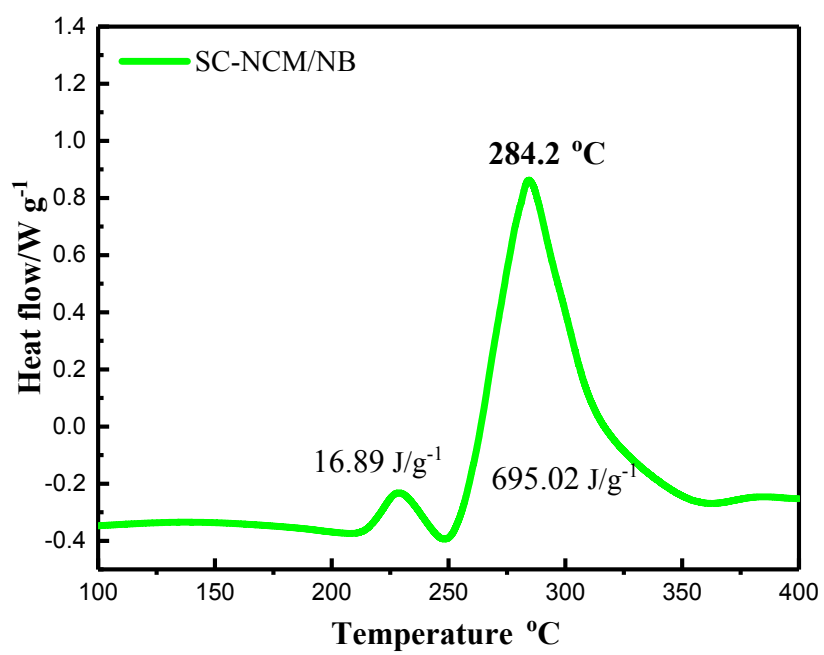

Figure S10 DSC curves of SC-NCM/NB sample
